# Supplementary material
Source: PubMed Central journal article supplement (PMC394230)
Supplement: 7600138s1.pdf [file 7600138s1.pdf]

Supplemental data 1 Meiotic progression profiles of *gcn5*<sup>+</sup> cells and *gcn5* $\Delta$  cells

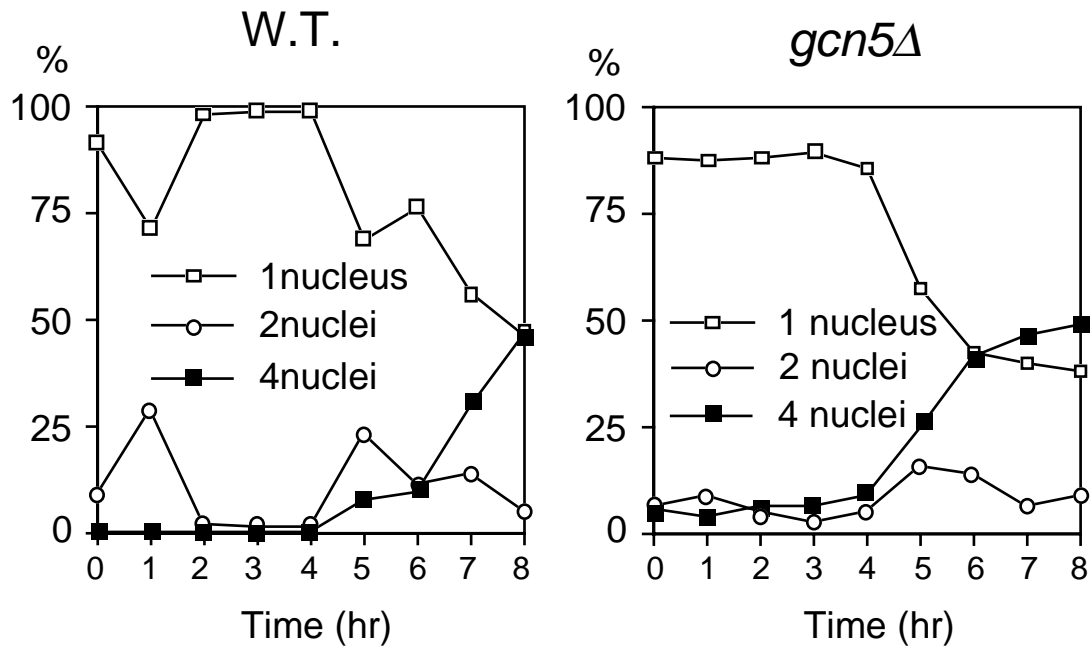

DTY2 (*gcn5*<sup>+</sup>), and DTY9 (*gcn5* $\Delta$ ) diploid cells were shifted to meiosis. Cells were collected and their nuclei were stained with DAPI every 1 hour. The percentages of cells with one nucleus, and two-four nuclei were indicated. The *gcn5* $\Delta$  cells could not be uniformly stained by propidium iodide for unknown reasons, so that we could not analyze DNA content in cells by flow or laser scanning cytometry.
