# Supplementary material
Source: PubMed Central journal article supplement (PMC394230)
Supplement: 7600138s2.pdf [file 7600138s2.pdf]

## Supplemental Data2    Strains used in this study.

| Strain | Genotypes    |                                                                                                   | Source          |
|--------|--------------|---------------------------------------------------------------------------------------------------|-----------------|
| GP1725 | <i>h-</i>    | <i>ade6-M26 pat1-114 end1-458</i>                                                                 | This study      |
| K213   | <i>h-</i>    | <i>ade6-M26 pat1-114 atf1-D15::ura4 ura4-D18 his3-D1 leu1-32</i>                                  | This study      |
| K214   | <i>h-</i>    | <i>ade6-M375 pat1-114 atf1-D15::ura4 ura4-D18 his3-D1 leu1-32</i>                                 | This study      |
| K341   | <i>h-</i>    | <i>ade6-M26 pat1-114 rad50S ura4-D18</i>                                                          | This study      |
| K343   | <i>h-</i>    | <i>ade6-M375 pat1-114 rad50S ura4-D18</i>                                                         | This study      |
| K364   | <i>h-</i>    | <i>lys4-95</i>                                                                                    | Bern collection |
| K365   | <i>h+</i>    | <i>lys4-95</i>                                                                                    | Bern collection |
| K366   | <i>h-</i>    | <i>lys7-2</i>                                                                                     | Bern collection |
| K367   | <i>h+</i>    | <i>lys7-2</i>                                                                                     | Bern collection |
| K368   | <i>h-</i>    | <i>lys2-120</i>                                                                                   | Bern collection |
| K369   | <i>h+</i>    | <i>leu2-120</i>                                                                                   | Bern collection |
| K370   | <i>h-</i>    | <i>ade1-40</i>                                                                                    | Bern collection |
| K371   | <i>h+</i>    | <i>ade1-40</i>                                                                                    | Bern collection |
| TY28   | <i>h-</i>    | <i>lys4-95    gcn5::kanMX</i>                                                                     | This study      |
| TY29   | <i>h+</i>    | <i>lys4-95    gcn5::kanMX</i>                                                                     | This study      |
| TY30   | <i>h-</i>    | <i>lys7-2    gcn5::kanMX</i>                                                                      | This study      |
| TY31   | <i>h+</i>    | <i>lys7-2    gcn5::kanMX</i>                                                                      | This study      |
| TY32   | <i>h-</i>    | <i>leu2-120    gcn5::kanMX</i>                                                                    | This study      |
| TY33   | <i>h+</i>    | <i>leu2-120    gcn5::kanMX</i>                                                                    | This study      |
| TY34   | <i>h-</i>    | <i>ade1-40    gcn5::kanMX</i>                                                                     | This study      |
| TY35   | <i>h+</i>    | <i>ade1-40    gcn5::kanMX</i>                                                                     | This study      |
| TY24   | <i>h-</i>    | <i>ade6-M26 pat1-114 rad50S ura4-D18 gcn5::ura4</i>                                               | This study      |
| DTY2   | <i>h+/h-</i> | <i>ade6-M26/ade6-M26 ura4-D18/ura4-D18 his5-303/+ +/leu1-32</i>                                   | This study      |
| DTY4   | <i>h+/h-</i> | <i>ade6-M375/ade6-M375 ura4-D18/ura4-D18 his5-303/+ +/leu1-32</i>                                 | This study      |
| DTY9   | <i>h+/h-</i> | <i>ade6-M26/ade6-M26 ura4-D18/ura4-D18 his5-303/+ +/leu1-32</i><br><i>gcn5::ura4/gcn5::ura4</i>   | This study      |
| DTY11  | <i>h+/h-</i> | <i>ade6-M375/ade6-M375 ura4-D18/ura4-D18 his5-303/+ +/leu1-32</i><br><i>gcn5::ura4/gcn5::ura4</i> | This study      |
| DTY12  | <i>h+/h-</i> | <i>ade6-M26/ade6-469 ura4-D18/ura4-D18 his5-303/+ +/leu1-32</i><br><i>gcn5::ura4/gcn5::ura4</i>   | This study      |
| DTY13  | <i>h+/h-</i> | <i>ade6-M375/ade6-469 ura4-D18/ura4-D18 his5-303/+ +/leu1-32</i>                                  | This study      |

|           |              | <i>gcn5::ura4/gcn5::ura4</i>                                                                                                                                    |            |
|-----------|--------------|-----------------------------------------------------------------------------------------------------------------------------------------------------------------|------------|
| DTY14     | <i>h+/h-</i> | <i>ade6-M26/ade6-469 ura4-D18/ura4-D18 his5-303/+ +/-leu1-32</i>                                                                                                | This study |
| DTY15     | <i>h+/h-</i> | <i>ade6-M375/ade6-469 ura4-D18/ura4-D18 his5-303/+ +/-leu1-32</i>                                                                                               | This study |
| WSP779    | <i>h+/h-</i> | <i>ade6-M26/ade6-M26 ura4-D18/ura4-D18 his3-D1/his3-D1 leu1-32/leu1-32</i> Kon et al., 1997<br><i>atf1-D15::ura4/atf1-D15::ura4</i>                             |            |
| WSP780    | <i>h+/h-</i> | <i>ade6-M375/ade6-M375 ura4-D18/ura4-D18 his3-D1/his3-D1 leu1-32/leu1-32</i> Kon et al., 1997<br><i>atf1-D15::ura4/atf1-D15::ura4</i>                           |            |
| WSP857    | <i>h+/h-</i> | <i>ade6-M26/ade6-M26 ura4-D18/ura4-D18 his3-D1/his3-D1 leu1-32/leu1-32</i> Kon et al., 1997<br><i>pcr1-D1::his4/pcr1-D1::his4</i>                               |            |
| WSP859    | <i>h+/h-</i> | <i>ade6-M26/ade6-M26 ura4-D18/ura4-D18 his3-D1/his3-D1 leu1-32/leu1-32</i> Kon et al., 1997<br><i>atf1-D15::ura4/atf1-D15::ura4 pcr1-D1::his4/pcr1-D1::his4</i> |            |
| S13A1     | <i>h+</i>    | <i>ade6-M26 snf22::ura4+ his5-303 ura4-D18</i>                                                                                                                  | This study |
| S13B5     | <i>h-</i>    | <i>ade6-M26 snf22::ura4+ leu1-32 ura4-D18</i>                                                                                                                   | This study |
| S13E1     | <i>h+</i>    | <i>ade6-M375 his5-303 snf22::ura4+ ura4-D18</i>                                                                                                                 | This study |
| S13H1     | <i>h-</i>    | <i>ade6-469 leu1-32 snf22::ura4+ ura4-D18</i>                                                                                                                   | This study |
| S13G5A1   | <i>h+</i>    | <i>ade6-M26 snf22::ura4+ gcn5::ura4+ ura4-D18 his5-303</i>                                                                                                      | This study |
| S13G5B1   | <i>h-</i>    | <i>ade6-M26 snf22::ura4+ gcn5::ura4+ ura4-D18 leu1-32</i>                                                                                                       | This study |
| S13G5E1   | <i>h+</i>    | <i>ade6-M375 snf22::ura4+ gcn5::ura4+ ura4-D18 his5-303</i>                                                                                                     | This study |
| S13G5H1   | <i>h-</i>    | <i>ade6-469 snf22::ura4+ gcn5::ura4+ ura4-D18 leu1-32</i>                                                                                                       | This study |
| S13G5K1   | <i>h+</i>    | <i>lys4-95 gcn5::kanMX snf22::ura4+ ura4-D18</i>                                                                                                                | This study |
| S13G5L1   | <i>h-</i>    | <i>lys4-95 gcn5::kanMX snf22::ura4+ ura4-D18</i>                                                                                                                | This study |
| S13G5Q1   | <i>h+</i>    | <i>ade1-40 gcn5::kanMX snf22::ura4+ ura4-D18</i>                                                                                                                | This study |
| S13G5R1   | <i>h-</i>    | <i>ade1-40 gcn5::kanMX snf22::ura4+ ura4-D18</i>                                                                                                                | This study |
| S13G5M1   | <i>h+</i>    | <i>lys7-2 gcn5::kanMX snf22::ura4+ ura4-D18</i>                                                                                                                 | This study |
| S13G5N1   | <i>h-</i>    | <i>lys7-2 gcn5::kanMX snf22::ura4+ ura4-D18</i>                                                                                                                 | This study |
| S13G5O1   | <i>h+</i>    | <i>leu2-120 gcn5::kanMX snf22::ura4+ ura4-D18</i>                                                                                                               | This study |
| S13G5P1   | <i>h-</i>    | <i>leu2-120 gcn5::kanMX snf22::ura4+ ura4-D18</i>                                                                                                               | This study |
| KX111     | <i>h+/h-</i> | <i>ade6-M26/+ his5-303/+ +/-leu1-32 ura4-D18/ura4-D18</i>                                                                                                       | This study |
| D13A1B5   | <i>h+/h-</i> | <i>ade6-M26/ade6-M26 snf22::ura4+/snf22::ura4+ his5-303/+</i><br><i>+/-leu1-32 ura4-D18/ura4-D18</i>                                                            | This study |
| D13G5A1B1 | <i>h+/h-</i> | <i>ade6-M26/ade6-M26 snf22::ura4+/snf22::ura4+ gcn5::ura4+/gcn5::ura4+</i><br><i>his5-303/+ +/-leu1-32 ura4-D18/ura4-D18</i>                                    | This study |
